# Supplementary material for: Insights into the mechanisms and kinetics of the hydroperoxyl radical scavenging activity of Artepillin C
Source: Royal Society of Chemistry journal article supplement (doi:10.1039/d1nj00666e), 2021-01-01
Supplement: d1nj00666e1.pdf [file d1nj00666e1.pdf]

## Supporting Information (SI)

### Insights into the mechanisms and kinetics of the hydroperoxyl radical scavenging activity of Artepillin C

Houssef Boulebd<sup>1\*</sup>, Adam Mechler<sup>2</sup>, Nguyen Thi Hoa<sup>3</sup> Pham Cam Nam,<sup>4</sup> Duong Tuan Quang<sup>5</sup> and Quan V. Vo<sup>3\*</sup>

<sup>1</sup>Laboratory of Synthesis of Molecules with Biological Interest, University of Frères Mentouri Constantine 1, Constantine, Algeria.

<sup>2</sup>Department of Chemistry and Physics, La Trobe University, Victoria 3086, Australia.

<sup>3</sup>The University of Danang - University of Technology and Education, Danang 550000, Vietnam.

<sup>4</sup>Department of Chemical Engineering, The University of Danang - University of Science and Technology, Danang 550000, Vietnam

<sup>5</sup>Hue University, Hue 530000, Vietnam.

\*Corresponding author: [boulebd.houssef@umc.edu.dz](mailto:boulebd.houssef@umc.edu.dz); [vvquan@ute.udn.vn](mailto:vvquan@ute.udn.vn)

## Table of Contents

|                                                                                                                                                                                                                                                                                                               |     |
|---------------------------------------------------------------------------------------------------------------------------------------------------------------------------------------------------------------------------------------------------------------------------------------------------------------|-----|
| Table S1. The method to calculate rate constant following the conventional transition state theory .....                                                                                                                                                                                                      | S2  |
| Table S2. The Calculated Free Energy ( $\Delta G^\circ$ , in kcal/mol at 298.15 K) of the Reaction Between AC with HOO <sup>*</sup> Radical via the Formal Hydrogen Transfer (FHT), Sequential Proton (SA), single electron transfer (SET) and radical adduct formation (RAF) Processes in the Gas Phase..... | S4  |
| Table S3. Selected parameters at the bond critical points (BCPs) at intermolecular contacts for TS-C10-H-OOH and TS-O7-H-OOH (M06-2X/6-311++G(d,p)).....                                                                                                                                                      | S5  |
| Table S4. Calculated $\Delta H$ (kcal/mol), $\Delta G^\ddagger$ (kcal/mol), $\kappa$ , $k_{\text{Eck}}$ ( $\text{M}^{-1} \text{s}^{-1}$ ) and branching ratios ( $\Gamma$ , %) at 298.15 K for the HOO <sup>*</sup> scavenging of the AC-ANION in the gas phase. ....                                         | S6  |
| Table S5: The cartesian coordinates and energies of TS of the reaction between AC with HOO <sup>*</sup> at the M06-2x/6-311++G(d,p) calculating method following the mechanisms in the studied environments.....                                                                                              | S7  |
| Figure S1. IRC plots for the transition states related to the reaction of HOO <sup>*</sup> radical with AC compound .....                                                                                                                                                                                     | S21 |
| References .....                                                                                                                                                                                                                                                                                              | S22 |

**Table S1. The method to calculate rate constant following the conventional transition state theory**

The rate constant ( $k$ ) was calculated by using the conventional transition state theory (TST) (at 298.15 K, 1M standard state) according to the equation (1):<sup>1-5</sup>

$$k = \sigma \kappa \frac{k_B T}{h} e^{-(\Delta G^\ddagger)/RT} \quad (1)$$

Where:  $\sigma$  is the reaction symmetry number,<sup>6,7</sup>

$\kappa$  contains the tunneling corrections calculated using the Eckart barrier,<sup>8</sup>

$k_B$  is the Boltzmann constant,

$h$  is the Planck constant,

$\Delta G^\ddagger$  is the Gibbs free energy of activation.

The Marcus Theory was used to estimate the reaction barriers of SET reactions.<sup>9-12</sup> The free energy of reaction  $\Delta G^\ddagger$  for the SET pathway was computed following the equations (2,3).

$$\Delta G_{SET}^\ddagger = \frac{\lambda}{4} \left( 1 + \frac{\Delta G_{SET}^0}{\lambda} \right)^2 \quad (2)$$

$$\lambda \approx \Delta E_{SET} - \Delta G_{SET}^0 \quad (3)$$

where  $\Delta G_{SET}$  is the Gibbs energy of reaction,  $\Delta E_{SET}$  is the non-adiabatic energy difference between reactants and vertical products for SET.<sup>13, 14</sup>

For rate constants that were close to the diffusion limit a correction was applied to yield realistic results<sup>15</sup>. The apparent rate constants ( $k_{app}$ ) were calculated following the Collins–Kimball theory in the solvents at 298.15K;<sup>16</sup> the steady-state Smoluchowski rate constant ( $k_D$ ) for an irreversible bimolecular diffusion–controlled reaction was calculated following the literature as according to equations (4,5).<sup>15, 17</sup>

$$k_{app} = \frac{k_{TST} k_D}{k_{TST} + k_D} \quad (4)$$

$$k_D = 4\pi R_{AB} D_{AB} N_A \quad (5)$$

where  $R_{AB}$  is the reaction distance,  $N_A$  is the Avogadro constant, and  $D_{AB} = D_A + D_B$  ( $D_{AB}$  is the mutual diffusion coefficient of the reactants A and B),<sup>16, 18</sup> where  $D_A$  or  $D_B$  is estimated using the Stokes–Einstein formulation (6).<sup>19, 20</sup>

$$D_{A \text{ or } B} = \frac{k_B T}{6\pi \eta a_{A \text{ or } B}} \quad (6)$$

$\eta$  is the viscosity of the solvents (i.e.  $\eta(\text{H}_2\text{O}) = 8.91 \times 10^{-4} \text{ Pa s}$ ,  $\eta(\text{pentyl ethanoate}) = 8.62 \times 10^{-4} \text{ Pa s}$ ) and  $a$  is the radius of the solute.

The kinetic study requires different considerations. Water (dielectric constants,  $\epsilon = 78.35$ ) and pentyl ethanoate ( $\epsilon = 4.73$ ) are the *de facto* standard solvents in the literature to mimic the polar and nonpolar environments in the human body.<sup>15, 21-23</sup> Thus, these solvents were used to model the physiological environments. The solvent cage effects were included following the corrections proposed by Okuno,<sup>24</sup> adjusted with the free volume theory according to the Benson correction<sup>15, 25-27</sup> to reduce over-penalizing entropy losses in solution. For the species that have multiple conformers, all of these were investigated and the conformer with the lowest electronic energy was included in the analysis.<sup>22, 23</sup> The hindered internal rotation treatment was also applied to the single bonds to ensure that the obtained conformer has the lowest electronic energy.<sup>23, 28</sup> All transition states were characterized by the existence of only one single imaginary frequency. Intrinsic coordinate calculations (IRCs) were performed to ensure that each transition state is connected correctly with the pre-complex and post-complex.

**Table S2. The Calculated Free Energy ( $\Delta G^\circ$ , in kcal/mol at 298.15 k) of the Reaction Between AC with  $\text{HOO}^\bullet$  Radical via the Formal Hydrogen Transfer (FHT), Sequential Proton (SA), single electron transfer (SET) and radical adduct formation (RAF) Processes in the Gas Phase.**

The Formal Hydrogen Transfer (FHT) mechanism:  $\text{R-H} + \text{HOO}^\bullet \rightarrow \text{R}^\bullet + \text{HOOH}$

The Sequential Proton (SA) mechanism:  $\text{R-H} + \text{HOO}^\bullet \rightarrow \text{R}^- + \text{HOOH}^{+\bullet}$

The Single Electron Transfer (SET) mechanism:  $\text{R-H} + \text{HOO}^\bullet \rightarrow \text{RH}^{+\bullet} + \text{HOO}^-$

The radical adduct formation mechanism:  $\text{R-H} + \text{HOO}^\bullet \rightarrow \text{RH}(\text{HOO})^\bullet$

| Positions | Mechanism |       |       |      |
|-----------|-----------|-------|-------|------|
|           | FHT       | SA    | SET   | RAF  |
| 1OH       | 21.9      | 174.9 | 207.3 |      |
| 10CH      | -6.8      | 174.9 | 205.3 |      |
| 7OH       | -0.5      | 174.9 | 173.4 |      |
| C2        |           |       |       | -2.9 |
| C3        |           |       |       | 1.7  |
| C11       |           |       |       | 1.8  |
| C12       |           |       |       | 3.7  |

**Table S3. Selected parameters at the bond critical points (BCPs) at intermolecular contacts for TS-C10-H-OOH and TS-O7-H-OOH (M06-2X/6-311++G(d,p)).**

| Contacts                                                                                                                                                  | $\rho(r)$<br>(au) | $\nabla^2\rho(r)$<br>(au) | $G(r)^a$ (au) | $V(r)^b$ (au) | $G(r)/ V(r) $ | $H(r)^c$ (au) | $E_{HB}^d$<br>(kcal/mol) |
|-----------------------------------------------------------------------------------------------------------------------------------------------------------|-------------------|---------------------------|---------------|---------------|---------------|---------------|--------------------------|
| <b>TS-C10-H-OOH</b>                                                                                                                                       |                   |                           |               |               |               |               |                          |
| H10...O1'                                                                                                                                                 | 0.1575            | -0.0481                   | 0.0909        | -0.1939       | 0.4690        | -0.1030       | -60.8                    |
| H6...O1'                                                                                                                                                  | 0.0102            | 0.0377                    | 0.0082        | -0.0070       | 1.1780        | 0.0012        | -2.2                     |
| <b>TS-O7-H-OOH</b>                                                                                                                                        |                   |                           |               |               |               |               |                          |
| H7...O1'                                                                                                                                                  | 0.1403            | -0.0134                   | 0.0872        | -0.1778       | 0.4906        | -0.0906       | -55.8                    |
| C11...O1'                                                                                                                                                 | 0.0066            | 0.0222                    | 0.0049        | -0.0042       | 1.1547        | 0.0007        | -1.3                     |
| H10...O1'                                                                                                                                                 | 0.0082            | 0.0260                    | 0.0060        | -0.0054       | 1.0972        | 0.0005        | -1.7                     |
| C7...O2'                                                                                                                                                  | 0.0157            | 0.0530                    | 0.0121        | -0.0110       | 1.1006        | 0.0011        | -3.5                     |
| C12...O2'                                                                                                                                                 | 0.0083            | 0.0297                    | 0.0065        | -0.0055       | 1.1733        | 0.0010        | -1.7                     |
| H13...O2'                                                                                                                                                 | 0.0067            | 0.0252                    | 0.0054        | -0.0045       | 1.2081        | 0.0009        | -1.4                     |
| RCP1<br>(C7-O7-H7-O1'-<br>O2')                                                                                                                            | 0.0146            | 0.0695                    | 0.0155        | -0.0136       | 1.1387        | 0.0019        | -4.3                     |
| RCP2<br>(O2'-C12-C13-H13-<br>O2')                                                                                                                         | 0.0066            | 0.0268                    | 0.0056        | -0.0045       | 1.2420        | 0.0011        | -1.4                     |
| RCP3<br>(O2'-C7-C8-C10-<br>C11-C12-O2')                                                                                                                   | 0.0056            | 0.0198                    | 0.0043        | -0.0037       | 1.1718        | 0.0006        | -1.2                     |
| a) electron kinetic energy density; b) electron potential energy density; c) total electron energy density; d) individual energies of each hydrogen bond. |                   |                           |               |               |               |               |                          |

**Table S4. Calculated  $\Delta H$  (kcal/mol),  $\Delta G^\ddagger$  (kcal/mol),  $\kappa$ ,  $k_{\text{Eck}}$  ( $\text{M}^{-1} \text{s}^{-1}$ ) and branching ratios ( $\Gamma$ , %) at 298.15 K for the  $\text{HOO}^\bullet$  scavenging of the AC-ANION in the gas phase.**

| Mechanisms                             | Positions | $\Delta G^\ddagger$ | $\kappa$ | $k_{\text{Eck}}$                     | $\Gamma$ |
|----------------------------------------|-----------|---------------------|----------|--------------------------------------|----------|
| <b>HAT</b>                             | O7-H      | 4.9                 | 3.7      | $5.96 \times 10^9$                   | 100.0    |
|                                        | C10-H     | 19.0                | 133.4    | $1.02 \times 10^1$                   | 0.0      |
| <b>RAF</b>                             | C2        | 17.8                | 2.6      | 1.44                                 | 0.0      |
|                                        | C3        | 18.1                | 1.4      | 0.518                                | 0.0      |
|                                        | C11       | 18.0                | 1.6      | 0.663                                | 0.0      |
|                                        | C12       | 18.5                | 1.5      | 0.253                                | 0.0      |
| <b><math>k_{\text{overall}}</math></b> |           |                     |          | <b><math>5.96 \times 10^9</math></b> |          |

**Table S5: The cartesian coordinates and energies of TS of the reaction between AC with HOO<sup>\*</sup> at the M06-2x/6-311++G(d,p) calculating method following the mechanisms in the studied environments**

| Name                  |             |             |             | TS-AC-O7-H-OOH-FHT (gas phase)               |                             |
|-----------------------|-------------|-------------|-------------|----------------------------------------------|-----------------------------|
| Cartesian Coordinates |             |             |             | Frequency and Energy                         |                             |
| C                     | -0.20921700 | -0.89840200 | 1.18448500  | Zero-point correction=                       | 0.401912 (Hartree/Particle) |
| C                     | 1.17127300  | -0.91251900 | 1.11476300  | Thermal correction to Energy=                | 0.428623                    |
| C                     | 1.88576700  | 0.00425500  | 0.32719400  | Thermal correction to Enthalpy=              | 0.429568                    |
| C                     | 1.17663400  | 0.96134300  | -0.41814200 | Thermal correction to Gibbs Free Energy=     | 0.342616                    |
| C                     | -0.20103600 | 1.02592800  | -0.36864700 | Sum of electronic and zero-point Energies=   | -1114.452812                |
| C                     | -0.90914200 | 0.09822200  | 0.45286700  | Sum of electronic and thermal Energies=      | -1114.426100                |
| C                     | -0.98350300 | 2.06667600  | -1.13326100 | Sum of electronic and thermal Enthalpies=    | -1114.425156                |
| C                     | -1.44037200 | 3.17516300  | -0.21635700 | Sum of electronic and thermal Free Energies= | -1114.512107                |
| C                     | -2.68980600 | 3.44347700  | 0.16754900  |                                              |                             |
| C                     | -2.97010900 | 4.57403700  | 1.12187600  |                                              |                             |
| C                     | -3.91246500 | 2.67988800  | -0.25931100 |                                              |                             |
| C                     | -0.99316100 | -1.89826300 | 1.99931900  |                                              |                             |
| C                     | -2.00228600 | -2.65501200 | 1.15983000  |                                              |                             |
| C                     | -1.69423900 | -3.49499300 | 0.17145000  |                                              |                             |
| C                     | 3.34505400  | -0.08736000 | 0.30486300  |                                              |                             |
| O                     | -2.21687800 | 0.17274600  | 0.54079000  |                                              |                             |
| C                     | -0.27991400 | -3.83908900 | -0.21000100 |                                              |                             |
| C                     | -2.75889700 | -4.10575700 | -0.69476600 |                                              |                             |
| C                     | 4.18970000  | 0.75653700  | -0.30181300 |                                              |                             |
| C                     | 5.67262500  | 0.65027700  | -0.23727700 |                                              |                             |
| O                     | 6.38554800  | 1.59979800  | -0.37970700 |                                              |                             |
| O                     | 6.19945100  | -0.57076800 | 0.00795600  |                                              |                             |
| H                     | 1.72052900  | -1.66130700 | 1.67843500  |                                              |                             |
| H                     | 1.70984800  | 1.66270800  | -1.05036500 |                                              |                             |
| H                     | -0.34093100 | 2.48155300  | -1.91557800 |                                              |                             |
| H                     | -1.84318600 | 1.60024900  | -1.62037500 |                                              |                             |
| H                     | -0.63555900 | 3.78845800  | 0.18396500  |                                              |                             |
| H                     | -2.05642500 | 5.08615900  | 1.42480000  |                                              |                             |
| H                     | -3.64375100 | 5.30518100  | 0.66462100  |                                              |                             |
| H                     | -3.47115900 | 4.19710200  | 2.01894200  |                                              |                             |
| H                     | -4.67185400 | 3.37104000  | -0.63712800 |                                              |                             |
| H                     | -3.71850000 | 1.92819800  | -1.02184700 |                                              |                             |
| H                     | -4.34204400 | 2.16764100  | 0.60709800  |                                              |                             |
| H                     | -0.29174000 | -2.58073500 | 2.48782700  |                                              |                             |
| H                     | -1.52265300 | -1.36209400 | 2.79072400  |                                              |                             |
| H                     | -3.04782900 | -2.43174300 | 1.34563700  |                                              |                             |
| H                     | 3.74983700  | -0.92041300 | 0.87796800  |                                              |                             |
| H                     | -2.67473200 | -0.31000000 | -0.35187300 |                                              |                             |
| H                     | 0.43025400  | -3.65338200 | 0.59647500  |                                              |                             |
| H                     | -0.20575200 | -4.89110900 | -0.49743800 |                                              |                             |
| H                     | 0.02509400  | -3.23883400 | -1.07425900 |                                              |                             |
| H                     | -3.75629000 | -3.79450800 | -0.38390100 |                                              |                             |
| H                     | -2.61215500 | -3.79047700 | -1.73299100 |                                              |                             |
| H                     | -2.70405700 | -5.19851900 | -0.67281500 |                                              |                             |
| H                     | 3.84817900  | 1.64679700  | -0.81553400 |                                              |                             |
| H                     | 5.52713800  | -1.25282800 | -0.08227300 |                                              |                             |
| H                     | -1.25678800 | -0.54571000 | -2.43215900 |                                              |                             |
| O                     | -2.84810100 | -0.82761700 | -1.50561100 |                                              |                             |
| O                     | -1.59463500 | -1.23289400 | -1.83538900 |                                              |                             |
| Name                  |             |             |             | TS-AC-O7-H-OOH-FHT (pentyl ethanoate)        |                             |

| Cartesian Coordinates |             |             |             | Frequency and Energy                         |                             |
|-----------------------|-------------|-------------|-------------|----------------------------------------------|-----------------------------|
| C                     | -0.22524100 | -0.91327200 | 1.16565100  | Zero-point correction=                       | 0.401277 (Hartree/Particle) |
| C                     | 1.15602600  | -0.92589500 | 1.10147800  | Thermal correction to Energy=                | 0.428104                    |
| C                     | 1.87007400  | 0.00366200  | 0.32693600  | Thermal correction to Enthalpy=              | 0.429048                    |
| C                     | 1.16364000  | 0.97196900  | -0.40684200 | Thermal correction to Gibbs Free Energy=     | 0.341122                    |
| C                     | -0.21490100 | 1.03235900  | -0.36287000 | Sum of electronic and zero-point Energies=   | -1114.485248                |
| C                     | -0.92409600 | 0.08906700  | 0.43978900  | Sum of electronic and thermal Energies=      | -1114.458422                |
| C                     | -0.98882000 | 2.08965500  | -1.11329600 | Sum of electronic and thermal Enthalpies=    | -1114.457477                |
| C                     | -1.41497300 | 3.20230400  | -0.18629900 | Sum of electronic and thermal Free Energies= | -1114.545404                |
| C                     | -2.65762100 | 3.52344800  | 0.18403600  |                                              |                             |
| C                     | -2.90364900 | 4.66183400  | 1.13837800  |                                              |                             |
| C                     | -3.90635200 | 2.81991900  | -0.26804800 |                                              |                             |
| C                     | -1.00402100 | -1.92183300 | 1.97499200  |                                              |                             |
| C                     | -1.99594300 | -2.70059700 | 1.13532900  |                                              |                             |
| C                     | -1.67014400 | -3.57725600 | 0.18357500  |                                              |                             |
| C                     | 3.32945300  | -0.08902500 | 0.30836500  |                                              |                             |
| O                     | -2.23487600 | 0.16013800  | 0.52479400  |                                              |                             |
| C                     | -0.25084800 | -3.93106100 | -0.16641500 |                                              |                             |
| C                     | -2.71893000 | -4.23457600 | -0.66805800 |                                              |                             |
| C                     | 4.16783800  | 0.76215400  | -0.29877500 |                                              |                             |
| C                     | 5.64635400  | 0.66082200  | -0.24569500 |                                              |                             |
| O                     | 6.36064100  | 1.60920700  | -0.43381400 |                                              |                             |
| O                     | 6.19363500  | -0.53752000 | 0.03346500  |                                              |                             |
| H                     | 1.70593300  | -1.67987900 | 1.65763600  |                                              |                             |
| H                     | 1.69733600  | 1.68624200  | -1.02436900 |                                              |                             |
| H                     | -0.34241300 | 2.49847100  | -1.89520700 |                                              |                             |
| H                     | -1.85667300 | 1.64192800  | -1.60242500 |                                              |                             |
| H                     | -0.59107300 | 3.78134800  | 0.22803400  |                                              |                             |
| H                     | -1.97393000 | 5.14183200  | 1.44782300  |                                              |                             |
| H                     | -3.54913400 | 5.41717600  | 0.67832400  |                                              |                             |
| H                     | -3.42409500 | 4.30295300  | 2.03250800  |                                              |                             |
| H                     | -4.59737900 | 3.53899400  | -0.72034400 |                                              |                             |
| H                     | -3.72494600 | 2.01909800  | -0.98231100 |                                              |                             |
| H                     | -4.41936100 | 2.38794700  | 0.59725400  |                                              |                             |
| H                     | -0.29391600 | -2.59108400 | 2.46828200  |                                              |                             |
| H                     | -1.54639900 | -1.39295100 | 2.76294300  |                                              |                             |
| H                     | -3.04619800 | -2.47626500 | 1.29564800  |                                              |                             |
| H                     | 3.72640100  | -0.92923900 | 0.87623700  |                                              |                             |
| H                     | -2.68505300 | -0.30351800 | -0.37521700 |                                              |                             |
| H                     | 0.45374100  | -3.69304400 | 0.63140700  |                                              |                             |
| H                     | -0.16657000 | -4.99817100 | -0.39195000 |                                              |                             |
| H                     | 0.05757600  | -3.38434600 | -1.06493200 |                                              |                             |
| H                     | -3.72358500 | -3.90621800 | -0.39765500 |                                              |                             |
| H                     | -2.54932000 | -3.99133600 | -1.72237300 |                                              |                             |
| H                     | -2.66878700 | -5.32488300 | -0.57829600 |                                              |                             |
| H                     | 3.81682200  | 1.64816500  | -0.81426900 |                                              |                             |
| H                     | 5.52670700  | -1.23545400 | 0.02312500  |                                              |                             |
| H                     | -1.26669300 | -0.54331600 | -2.44251800 |                                              |                             |
| O                     | -2.86701900 | -0.83406900 | -1.53036700 |                                              |                             |
| O                     | -1.61563700 | -1.24232000 | -1.86167300 |                                              |                             |
| <b>Name</b>           |             |             |             | <b>TS-AC-C10-H-OOH-FHT (gas phase)</b>       |                             |
| Cartesian Coordinates |             |             |             | Frequency and Energy                         |                             |
| C                     | -1.20499500 | -1.19969900 | -0.76062500 | Zero-point correction=                       | 0.401153 (Hartree/Particle) |
| C                     | -1.79774000 | 0.05294200  | -0.68116200 | Thermal correction to Energy=                | 0.428915                    |



|                       |             |             |             |                                              |                             |
|-----------------------|-------------|-------------|-------------|----------------------------------------------|-----------------------------|
| C                     | -1.10815700 | 1.17400900  | -0.21018700 | Thermal correction to Enthalpy=              | 0.429859                    |
| C                     | 0.21243300  | 1.01113900  | 0.21800400  | Thermal correction to Gibbs Free Energy=     | 0.336921                    |
| C                     | 0.83448600  | -0.22914200 | 0.17062500  | Sum of electronic and zero-point Energies=   | -1114.443210                |
| C                     | 0.11938400  | -1.32791800 | -0.33409000 | Sum of electronic and thermal Energies=      | -1114.415448                |
| C                     | 2.24591200  | -0.42924400 | 0.64309000  | Sum of electronic and thermal Enthalpies=    | -1114.414504                |
| C                     | 3.22747100  | -0.76997600 | -0.39124200 | Sum of electronic and thermal Free Energies= | -1114.507442                |
| C                     | 4.45535200  | -1.30145700 | -0.18980900 |                                              |                             |
| C                     | 5.36773800  | -1.59447800 | -1.34571700 |                                              |                             |
| C                     | 5.00672300  | -1.64175600 | 1.16468500  |                                              |                             |
| C                     | -1.96214500 | -2.41148500 | -1.25521400 |                                              |                             |
| C                     | -2.39835000 | -3.28860800 | -0.10843900 |                                              |                             |
| C                     | -3.63612200 | -3.45043400 | 0.36370500  |                                              |                             |
| C                     | -1.79035800 | 2.47025700  | -0.18227000 |                                              |                             |
| O                     | 0.67269700  | -2.56975000 | -0.41272600 |                                              |                             |
| C                     | -4.86762200 | -2.77638000 | -0.17907100 |                                              |                             |
| C                     | -3.90139000 | -4.35755200 | 1.53664500  |                                              |                             |
| C                     | -1.23284800 | 3.66613100  | 0.04161800  |                                              |                             |
| C                     | -1.97724200 | 4.95113400  | 0.00007700  |                                              |                             |
| O                     | -1.45003400 | 5.99712400  | -0.24434200 |                                              |                             |
| O                     | -3.31096900 | 4.90255200  | 0.23882300  |                                              |                             |
| H                     | -2.82796400 | 0.16153100  | -1.00914500 |                                              |                             |
| H                     | 0.77354900  | 1.85274800  | 0.60744600  |                                              |                             |
| H                     | 2.64384500  | 0.70930600  | 1.07045000  |                                              |                             |
| H                     | 2.31609900  | -1.01934800 | 1.56028700  |                                              |                             |
| H                     | 2.94254800  | -0.51937500 | -1.41118300 |                                              |                             |
| H                     | 4.90970200  | -1.33856000 | -2.30095000 |                                              |                             |
| H                     | 6.30587700  | -1.03882600 | -1.24670100 |                                              |                             |
| H                     | 5.63522500  | -2.65592300 | -1.35970600 |                                              |                             |
| H                     | 5.16095500  | -2.72249000 | 1.25036600  |                                              |                             |
| H                     | 5.98952000  | -1.17786000 | 1.29237500  |                                              |                             |
| H                     | 4.37167300  | -1.31298100 | 1.98499900  |                                              |                             |
| H                     | -2.81180700 | -2.07953700 | -1.85133100 |                                              |                             |
| H                     | -1.30824900 | -2.99111300 | -1.91263600 |                                              |                             |
| H                     | -1.58678700 | -3.81695200 | 0.38646600  |                                              |                             |
| H                     | -2.85530500 | 2.41783500  | -0.40738000 |                                              |                             |
| H                     | 1.62176000  | -2.52179300 | -0.25227600 |                                              |                             |
| H                     | -4.66885100 | -2.11927900 | -1.02374000 |                                              |                             |
| H                     | -5.60113600 | -3.52499600 | -0.49446700 |                                              |                             |
| H                     | -5.34334400 | -2.18219900 | 0.60767400  |                                              |                             |
| H                     | -2.98560900 | -4.82470700 | 1.89979800  |                                              |                             |
| H                     | -4.35582700 | -3.79817300 | 2.36062400  |                                              |                             |
| H                     | -4.60764200 | -5.14722700 | 1.26114100  |                                              |                             |
| H                     | -0.16480000 | 3.78805900  | 0.17762600  |                                              |                             |
| H                     | -3.55056500 | 4.04401700  | 0.60033100  |                                              |                             |
| H                     | 4.54698800  | 1.82843600  | 0.01387300  |                                              |                             |
| O                     | 3.17871900  | 1.82629000  | 1.27735000  |                                              |                             |
| O                     | 3.64645700  | 2.18184800  | 0.03993500  |                                              |                             |
| <b>Name</b>           |             |             |             | <b>TS-AC-C2-H-OOH-RAF (gas phase)</b>        |                             |
| Cartesian Coordinates |             |             |             | Frequency and Energy                         |                             |
| C                     | -0.85439600 | 1.11964900  | -0.75174800 | Zero-point correction=                       | 0.407165 (Hartree/Particle) |
| C                     | 0.52501600  | 1.18491700  | -0.66050500 | Thermal correction to Energy=                | 0.433996                    |
| C                     | 1.27856200  | 0.18019300  | -0.02925600 | Thermal correction to Enthalpy=              | 0.434941                    |
| C                     | 0.59299500  | -0.92124100 | 0.51071800  | Thermal correction to Gibbs Free Energy=     | 0.344687                    |
| C                     | -0.78644600 | -1.02103800 | 0.44361500  | Sum of electronic and zero-point Energies=   | -1114.452528                |

|                       |             |             |             |                                              |                             |
|-----------------------|-------------|-------------|-------------|----------------------------------------------|-----------------------------|
| C                     | -1.50288000 | 0.00576000  | -0.19864800 | Sum of electronic and thermal Energies=      | -1114.425696                |
| C                     | -1.52170800 | -2.18931600 | 1.06702000  | Sum of electronic and thermal Enthalpies=    | -1114.424752                |
| C                     | -2.33609100 | -2.96942700 | 0.06374400  | Sum of electronic and thermal Free Energies= | -1114.515005                |
| C                     | -3.63779600 | -3.27709200 | 0.12054900  |                                              |                             |
| C                     | -4.28678000 | -4.07856400 | -0.97681200 |                                              |                             |
| C                     | -4.57113700 | -2.89949000 | 1.24122400  |                                              |                             |
| C                     | -1.66789000 | 2.21952800  | -1.39494100 |                                              |                             |
| C                     | -2.37310200 | 3.06046900  | -0.35820600 |                                              |                             |
| C                     | -1.99212800 | 4.25433900  | 0.10076500  |                                              |                             |
| C                     | 2.71505300  | 0.30030600  | 0.02605900  |                                              |                             |
| O                     | -2.85517800 | -0.02280200 | -0.29553700 |                                              |                             |
| C                     | -0.76410800 | 5.00047700  | -0.34636100 |                                              |                             |
| C                     | -2.79193700 | 4.96541000  | 1.16025600  |                                              |                             |
| C                     | 3.56483700  | -0.53330100 | 0.70891800  |                                              |                             |
| C                     | 5.02158200  | -0.20094300 | 0.80575000  |                                              |                             |
| O                     | 5.59833500  | -0.14132400 | 1.85152100  |                                              |                             |
| O                     | 5.63512900  | 0.07473400  | -0.35825700 |                                              |                             |
| H                     | 1.04064300  | 2.04157300  | -1.08506000 |                                              |                             |
| H                     | 1.15109900  | -1.72260600 | 0.98247900  |                                              |                             |
| H                     | -0.78151300 | -2.85502900 | 1.51964200  |                                              |                             |
| H                     | -2.14862000 | -1.82188800 | 1.88333100  |                                              |                             |
| H                     | -1.77347200 | -3.31032800 | -0.80350200 |                                              |                             |
| H                     | -3.57921400 | -4.33235400 | -1.76608200 |                                              |                             |
| H                     | -4.70365600 | -5.00600100 | -0.57271600 |                                              |                             |
| H                     | -5.11911300 | -3.52292100 | -1.41912200 |                                              |                             |
| H                     | -5.44499000 | -2.37416800 | 0.84352400  |                                              |                             |
| H                     | -4.94578200 | -3.80501400 | 1.72772100  |                                              |                             |
| H                     | -4.11399100 | -2.27317200 | 2.00505600  |                                              |                             |
| H                     | -1.01215700 | 2.82552700  | -2.02024200 |                                              |                             |
| H                     | -2.41740900 | 1.76648300  | -2.04906700 |                                              |                             |
| H                     | -3.26434500 | 2.60557300  | 0.06632900  |                                              |                             |
| H                     | 3.15362800  | 1.09684700  | -0.57082900 |                                              |                             |
| H                     | -3.17325800 | -0.93064200 | -0.19305900 |                                              |                             |
| H                     | -0.21290000 | 4.49670300  | -1.13845600 |                                              |                             |
| H                     | -1.03499300 | 6.00000600  | -0.70006900 |                                              |                             |
| H                     | -0.08513600 | 5.13894900  | 0.50108700  |                                              |                             |
| H                     | -3.66393900 | 4.38556500  | 1.46377700  |                                              |                             |
| H                     | -2.17548000 | 5.15433700  | 2.04483000  |                                              |                             |
| H                     | -3.13277800 | 5.93987800  | 0.79642900  |                                              |                             |
| H                     | 3.20341800  | -1.18090200 | 1.49722900  |                                              |                             |
| H                     | 5.13309800  | -0.29667000 | -1.09999100 |                                              |                             |
| H                     | 3.05711300  | -1.65613900 | -2.18905400 |                                              |                             |
| O                     | 3.72731700  | -2.13950600 | -0.51319400 |                                              |                             |
| O                     | 3.94113100  | -1.71703100 | -1.79916300 |                                              |                             |
| <b>Name</b>           |             |             |             | <b>TS-AC-C2-H-OOH-FHT (pentyl ethanoate)</b> |                             |
| Cartesian Coordinates |             |             |             | Frequency and Energy                         |                             |
| C                     | -0.82504300 | 1.11831300  | -0.76631600 | Zero-point correction=                       | 0.406870 (Hartree/Particle) |
| C                     | 0.55182700  | 1.15249100  | -0.63318600 | Thermal correction to Energy=                | 0.433454                    |
| C                     | 1.26125300  | 0.13790700  | 0.03756300  | Thermal correction to Enthalpy=              | 0.434399                    |
| C                     | 0.52955500  | -0.92712700 | 0.59534200  | Thermal correction to Gibbs Free Energy=     | 0.346323                    |
| C                     | -0.84823400 | -0.99469900 | 0.48832400  | Sum of electronic and zero-point Energies=   | -1114.486916                |
| C                     | -1.51739700 | 0.03065700  | -0.21007100 | Sum of electronic and thermal Energies=      | -1114.460331                |
| C                     | -1.63358800 | -2.12456800 | 1.12133800  | Sum of electronic and thermal Enthalpies=    | -1114.459387                |
| C                     | -2.41983700 | -2.92104200 | 0.10748000  | Sum of electronic and thermal Free Energies= | -1114.547463                |

|                       |             |             |             |                                                           |
|-----------------------|-------------|-------------|-------------|-----------------------------------------------------------|
| C                     | -3.73155400 | -3.19421600 | 0.11211400  |                                                           |
| C                     | -4.34707100 | -4.01694000 | -0.98771000 |                                                           |
| C                     | -4.71053000 | -2.74672200 | 1.16461700  |                                                           |
| C                     | -1.58808800 | 2.21949100  | -1.46768000 |                                                           |
| C                     | -2.36912700 | 3.07425800  | -0.49534300 |                                                           |
| C                     | -1.93404400 | 4.18461500  | 0.10750400  |                                                           |
| C                     | 2.69620800  | 0.22712300  | 0.10626800  |                                                           |
| O                     | -2.86125300 | 0.02579700  | -0.35794100 |                                                           |
| C                     | -0.56643500 | 4.78052100  | -0.08492400 |                                                           |
| C                     | -2.80564500 | 4.93342600  | 1.07965900  |                                                           |
| C                     | 3.54286700  | -0.69677800 | 0.67176700  |                                                           |
| C                     | 4.98051400  | -0.35640300 | 0.88237100  |                                                           |
| O                     | 5.53181800  | -0.49678500 | 1.94038800  |                                                           |
| O                     | 5.63283600  | 0.15524900  | -0.17164800 |                                                           |
| H                     | 1.10319900  | 1.98221600  | -1.06609300 |                                                           |
| H                     | 1.04217000  | -1.71836500 | 1.13127400  |                                                           |
| H                     | -0.92444000 | -2.78760700 | 1.62465800  |                                                           |
| H                     | -2.28570400 | -1.71679400 | 1.89815600  |                                                           |
| H                     | -1.82586400 | -3.30932900 | -0.71851200 |                                                           |
| H                     | -3.60829900 | -4.31996400 | -1.73065500 |                                                           |
| H                     | -4.81327100 | -4.91614000 | -0.57244500 |                                                           |
| H                     | -5.13926200 | -3.45335900 | -1.49079600 |                                                           |
| H                     | -5.52654600 | -2.18206200 | 0.70138500  |                                                           |
| H                     | -5.16688400 | -3.62242500 | 1.63686100  |                                                           |
| H                     | -4.26997900 | -2.13340900 | 1.94933700  |                                                           |
| H                     | -0.88128500 | 2.82102000  | -2.04056500 |                                                           |
| H                     | -2.28518600 | 1.76970600  | -2.17934800 |                                                           |
| H                     | -3.36507800 | 2.71382200  | -0.25085300 |                                                           |
| H                     | 3.13713300  | 1.09318200  | -0.38298100 |                                                           |
| H                     | -3.20772800 | -0.86483900 | -0.19883900 |                                                           |
| H                     | 0.01293100  | 4.29264400  | -0.86780500 |                                                           |
| H                     | -0.64654600 | 5.84494100  | -0.32759900 |                                                           |
| H                     | 0.00293500  | 4.71221900  | 0.84852300  |                                                           |
| H                     | -3.77407500 | 4.44845800  | 1.21199800  |                                                           |
| H                     | -2.31620000 | 5.00546700  | 2.05666700  |                                                           |
| H                     | -2.97429700 | 5.95880600  | 0.73429000  |                                                           |
| H                     | 3.17211000  | -1.47267900 | 1.32933200  |                                                           |
| H                     | 5.15855700  | -0.05350700 | -0.99374300 |                                                           |
| H                     | 3.28986600  | -1.27812000 | -2.40863500 |                                                           |
| O                     | 3.86104400  | -2.05476500 | -0.79974600 |                                                           |
| O                     | 4.14780000  | -1.39146300 | -1.96959200 |                                                           |
| <b>Name</b>           |             |             |             | <b>TS-AC-C3-H-OOH-RAF (gas phase)</b>                     |
| Cartesian Coordinates |             |             |             | Frequency and Energy                                      |
| C                     | -0.64915700 | 1.06046600  | -0.93637600 | Zero-point correction= 0.407154 (Hartree/Particle)        |
| C                     | 0.72652800  | 0.88205300  | -0.94848500 | Thermal correction to Energy= 0.433870                    |
| C                     | 1.32446900  | -0.26462600 | -0.41796000 | Thermal correction to Enthalpy= 0.434815                  |
| C                     | 0.50730000  | -1.23098600 | 0.17544700  | Thermal correction to Gibbs Free Energy= 0.345735         |
| C                     | -0.87436300 | -1.08154100 | 0.22271900  | Sum of electronic and zero-point Energies= -1114.450260   |
| C                     | -1.44245900 | 0.06361600  | -0.35453300 | Sum of electronic and thermal Energies= -1114.423544      |
| C                     | -1.75574100 | -2.10967400 | 0.90077600  | Sum of electronic and thermal Enthalpies= -1114.422600    |
| C                     | -2.74442200 | -2.73763100 | -0.05166900 | Sum of electronic and thermal Free Energies= -1114.511680 |
| C                     | -4.07510100 | -2.81331700 | 0.07358800  |                                                           |
| C                     | -4.90920100 | -3.48734900 | -0.98368800 |                                                           |
| C                     | -4.86990800 | -2.27995000 | 1.23704500  |                                                           |

|                       |             |             |             |                                                           |
|-----------------------|-------------|-------------|-------------|-----------------------------------------------------------|
| C                     | -1.29600400 | 2.30877600  | -1.49132000 |                                                           |
| C                     | -1.73878100 | 3.23318400  | -0.38308800 |                                                           |
| C                     | -1.11821200 | 4.33662400  | 0.03987700  |                                                           |
| C                     | 2.78642700  | -0.39039200 | -0.42654500 |                                                           |
| O                     | -2.78560700 | 0.27794000  | -0.33972700 |                                                           |
| C                     | 0.16464600  | 4.87984100  | -0.52951300 |                                                           |
| C                     | -1.67753100 | 5.14860700  | 1.17843500  |                                                           |
| C                     | 3.44253900  | -1.61131800 | -0.36911900 |                                                           |
| C                     | 4.92059300  | -1.71715000 | -0.44902000 |                                                           |
| O                     | 5.46614200  | -2.63386700 | -0.99784300 |                                                           |
| O                     | 5.61054900  | -0.71279500 | 0.11363900  |                                                           |
| H                     | 1.35301200  | 1.65120300  | -1.39059700 |                                                           |
| H                     | 0.95088000  | -2.10886000 | 0.63393300  |                                                           |
| H                     | -1.11388300 | -2.89218200 | 1.31546400  |                                                           |
| H                     | -2.26661800 | -1.64424100 | 1.74729100  |                                                           |
| H                     | -2.29515300 | -3.16869700 | -0.94445200 |                                                           |
| H                     | -4.29777200 | -3.86078600 | -1.80506800 |                                                           |
| H                     | -5.46182400 | -4.32733400 | -0.55207300 |                                                           |
| H                     | -5.65196000 | -2.79356100 | -1.38883300 |                                                           |
| H                     | -5.65716300 | -1.60873300 | 0.87995600  |                                                           |
| H                     | -5.37245800 | -3.10653400 | 1.74816800  |                                                           |
| H                     | -4.27213200 | -1.74449600 | 1.97235700  |                                                           |
| H                     | -0.59665500 | 2.80136500  | -2.16667900 |                                                           |
| H                     | -2.17124900 | 2.01983800  | -2.07883600 |                                                           |
| H                     | -2.64724200 | 2.92451100  | 0.12820300  |                                                           |
| H                     | 3.32652600  | 0.44461600  | -0.86535100 |                                                           |
| H                     | -3.24902900 | -0.56701300 | -0.25993000 |                                                           |
| H                     | 0.54824100  | 4.30132400  | -1.36799900 |                                                           |
| H                     | 0.02451000  | 5.91293700  | -0.86226700 |                                                           |
| H                     | 0.93644300  | 4.90082000  | 0.24657400  |                                                           |
| H                     | -2.59928100 | 4.71543800  | 1.56773700  |                                                           |
| H                     | -0.95258900 | 5.21571100  | 1.99593400  |                                                           |
| H                     | -1.88594400 | 6.17318800  | 0.85449700  |                                                           |
| H                     | 2.90965700  | -2.54681100 | -0.26081200 |                                                           |
| H                     | 5.02488800  | -0.20915900 | 0.70518300  |                                                           |
| H                     | 1.71762100  | 0.17048400  | 2.25592500  |                                                           |
| O                     | 3.29176100  | 0.35036800  | 1.29962200  |                                                           |
| O                     | 2.58833700  | -0.25520000 | 2.29584000  |                                                           |
| <b>Name</b>           |             |             |             | <b>TS-AC-C11-H-OOH-RAF (gas phase)</b>                    |
| Cartesian Coordinates |             |             |             | Frequency and Energy                                      |
| C                     | -0.72861700 | 1.37168000  | 0.68383800  | Zero-point correction= 0.406049 (Hartree/Particle)        |
| C                     | -1.73128500 | 0.41213300  | 0.65397600  | Thermal correction to Energy= 0.433511                    |
| C                     | -1.51282400 | -0.87385200 | 0.15098800  | Thermal correction to Enthalpy= 0.434455                  |
| C                     | -0.24842200 | -1.17631200 | -0.36261500 | Thermal correction to Gibbs Free Energy= 0.342908         |
| C                     | 0.77690000  | -0.24069000 | -0.36837400 | Sum of electronic and zero-point Energies= -1114.443735   |
| C                     | 0.52809200  | 1.02820700  | 0.17690800  | Sum of electronic and thermal Energies= -1114.416273      |
| C                     | 2.12921800  | -0.58972500 | -0.95368800 | Sum of electronic and thermal Enthalpies= -1114.415329    |
| C                     | 3.17836200  | -0.75669200 | 0.12139400  | Sum of electronic and thermal Free Energies= -1114.506876 |
| C                     | 4.19659000  | 0.13541300  | 0.41243200  |                                                           |
| C                     | 5.00738800  | -0.03994400 | 1.65755200  |                                                           |
| C                     | 4.73782500  | 1.12321100  | -0.57633100 |                                                           |
| C                     | -0.97627100 | 2.76555200  | 1.21428900  |                                                           |
| C                     | -1.13132100 | 3.75877200  | 0.08972200  |                                                           |
| C                     | -2.25532000 | 4.35070200  | -0.31952200 |                                                           |

|                       |             |             |             |                                                           |
|-----------------------|-------------|-------------|-------------|-----------------------------------------------------------|
| C                     | -2.60924800 | -1.84456800 | 0.17893200  |                                                           |
| O                     | 1.48547000  | 1.99750900  | 0.20610900  |                                                           |
| C                     | -3.61741000 | 4.14020400  | 0.28550500  |                                                           |
| C                     | -2.24216200 | 5.31246100  | -1.47869000 |                                                           |
| C                     | -2.52874600 | -3.15468200 | -0.08241500 |                                                           |
| C                     | -3.66750900 | -4.10210000 | 0.02309500  |                                                           |
| O                     | -3.51521100 | -5.27371600 | 0.21494000  |                                                           |
| O                     | -4.91612700 | -3.58917200 | -0.09107100 |                                                           |
| H                     | -2.71093500 | 0.67038300  | 1.04655600  |                                                           |
| H                     | -0.05244600 | -2.15344800 | -0.79104100 |                                                           |
| H                     | 2.03653600  | -1.53951200 | -1.48280800 |                                                           |
| H                     | 2.43262900  | 0.15686300  | -1.69108200 |                                                           |
| H                     | 2.85441400  | -1.38849400 | 0.94568700  |                                                           |
| H                     | 4.57346800  | -0.78434400 | 2.32473000  |                                                           |
| H                     | 6.02290500  | -0.36099600 | 1.39718600  |                                                           |
| H                     | 5.10300400  | 0.90657700  | 2.19874600  |                                                           |
| H                     | 5.04909200  | 2.04516000  | -0.07716300 |                                                           |
| H                     | 5.63452600  | 0.69674900  | -1.04363400 |                                                           |
| H                     | 4.04705200  | 1.37578500  | -1.38040900 |                                                           |
| H                     | -1.85513700 | 2.74939800  | 1.85836100  |                                                           |
| H                     | -0.12383600 | 3.06331600  | 1.83098700  |                                                           |
| H                     | -0.21082400 | 3.97754500  | -0.44641500 |                                                           |
| H                     | -3.56732500 | -1.42492200 | 0.48466500  |                                                           |
| H                     | 2.36056100  | 1.59933900  | 0.14213600  |                                                           |
| H                     | -3.62054400 | 3.44286500  | 1.12130900  |                                                           |
| H                     | -4.02808900 | 5.09283600  | 0.63445500  |                                                           |
| H                     | -4.30709600 | 3.76042500  | -0.47505000 |                                                           |
| H                     | -1.23944300 | 5.43541600  | -1.88873800 |                                                           |
| H                     | -2.90290300 | 4.96123600  | -2.27768900 |                                                           |
| H                     | -2.61276600 | 6.29472900  | -1.16870100 |                                                           |
| H                     | -1.58592100 | -3.64036700 | -0.30261400 |                                                           |
| H                     | -4.87568400 | -2.68781600 | -0.42447000 |                                                           |
| H                     | 3.64017900  | -3.80441100 | -0.06741000 |                                                           |
| O                     | 4.26475500  | -2.15551300 | -0.68407000 |                                                           |
| O                     | 3.44450600  | -3.24947500 | -0.83460500 |                                                           |
| <b>Name</b>           |             |             |             | <b>TS-AC-C12-H-OOH-RAF (gas phase)</b>                    |
| Cartesian Coordinates |             |             |             | Frequency and Energy                                      |
| C                     | 1.04261600  | 1.24895700  | -0.75175600 | Zero-point correction= 0.406055 (Hartree/Particle)        |
| C                     | 1.95769200  | 0.20816100  | -0.66539800 | Thermal correction to Energy= 0.433167                    |
| C                     | 1.61331900  | -1.04247400 | -0.14526600 | Thermal correction to Enthalpy= 0.434111                  |
| C                     | 0.30865200  | -1.22782200 | 0.32309300  | Thermal correction to Gibbs Free Energy= 0.343784         |
| C                     | -0.63120800 | -0.20955100 | 0.26941100  | Sum of electronic and zero-point Energies= -1114.444239   |
| C                     | -0.25460700 | 1.02465100  | -0.28385200 | Sum of electronic and thermal Energies= -1114.417127      |
| C                     | -2.02887300 | -0.39326200 | 0.81677100  | Sum of electronic and thermal Enthalpies= -1114.416183    |
| C                     | -3.09353600 | -0.22667600 | -0.22863600 | Sum of electronic and thermal Free Energies= -1114.506510 |
| C                     | -4.37674900 | 0.22992300  | 0.01242900  |                                                           |
| C                     | -5.28440800 | 0.49738300  | -1.15861100 |                                                           |
| C                     | -4.72452400 | 0.94182100  | 1.29589500  |                                                           |
| C                     | 1.42809600  | 2.60561900  | -1.29608800 |                                                           |
| C                     | 1.63525300  | 3.60136500  | -0.18224000 |                                                           |
| C                     | 2.79261300  | 4.10839000  | 0.24750000  |                                                           |
| C                     | 2.62559200  | -2.10035900 | -0.10900600 |                                                           |
| O                     | -1.12442500 | 2.07088700  | -0.35980800 |                                                           |

|                              |             |             |             |                                                           |
|------------------------------|-------------|-------------|-------------|-----------------------------------------------------------|
| C                            | 4.14800200  | 3.78116800  | -0.31946600 |                                                           |
| C                            | 2.82771100  | 5.08695700  | 1.39208600  |                                                           |
| C                            | 2.42777600  | -3.39369900 | 0.17238000  |                                                           |
| C                            | 3.49051000  | -4.43084700 | 0.13900600  |                                                           |
| O                            | 3.25310000  | -5.59157600 | -0.03010800 |                                                           |
| O                            | 4.77059100  | -4.01511300 | 0.29509000  |                                                           |
| H                            | 2.96918900  | 0.37377900  | -1.02591200 |                                                           |
| H                            | 0.01653100  | -2.17702700 | 0.75868500  |                                                           |
| H                            | -2.11674200 | -1.40061900 | 1.24169600  |                                                           |
| H                            | -2.18961100 | 0.30527200  | 1.64469400  |                                                           |
| H                            | -2.87644700 | -0.64924500 | -1.20647300 |                                                           |
| H                            | -5.02301000 | -0.12511400 | -2.01570500 |                                                           |
| H                            | -6.32588600 | 0.31646600  | -0.88087900 |                                                           |
| H                            | -5.20597300 | 1.54546800  | -1.46221300 |                                                           |
| H                            | -4.27653400 | 1.94041300  | 1.32116800  |                                                           |
| H                            | -5.80564200 | 1.05244600  | 1.38044400  |                                                           |
| H                            | -4.37466600 | 0.38174500  | 2.16349000  |                                                           |
| H                            | 2.32162500  | 2.50074600  | -1.91094200 |                                                           |
| H                            | 0.62463000  | 2.96545200  | -1.94467000 |                                                           |
| H                            | 0.72225200  | 3.90178300  | 0.32656400  |                                                           |
| H                            | 3.62675500  | -1.76609300 | -0.37981100 |                                                           |
| H                            | -2.03144600 | 1.75404900  | -0.26861000 |                                                           |
| H                            | 4.11640700  | 3.06967900  | -1.14262900 |                                                           |
| H                            | 4.63980300  | 4.69215100  | -0.67462200 |                                                           |
| H                            | 4.78784900  | 3.36393100  | 0.46463800  |                                                           |
| H                            | 1.82825200  | 5.29542200  | 1.77465700  |                                                           |
| H                            | 3.43893300  | 4.69765300  | 2.21257600  |                                                           |
| H                            | 3.28260800  | 6.03167900  | 1.07769800  |                                                           |
| H                            | 1.44009900  | -3.79815400 | 0.35747200  |                                                           |
| H                            | 4.78879000  | -3.10462700 | 0.60461000  |                                                           |
| H                            | -6.11012100 | -2.13506700 | -0.78307000 |                                                           |
| O                            | -5.10546300 | -1.46553200 | 0.63435000  |                                                           |
| O                            | -5.25520300 | -2.35996700 | -0.38982100 |                                                           |
| <b>Name</b>                  |             |             |             | <b>TS-AC-ANION-O7-H-OOH-FHT (water)</b>                   |
| <b>Cartesian Coordinates</b> |             |             |             | <b>Frequency and Energy</b>                               |
| C                            | 0.16799200  | 0.92168600  | 1.17809100  | Zero-point correction= 0.388719 (Hartree/Particle)        |
| C                            | -1.21317700 | 0.87297200  | 1.13100800  | Thermal correction to Energy= 0.414890                    |
| C                            | -1.89729500 | -0.10014600 | 0.38079100  | Thermal correction to Enthalpy= 0.415834                  |
| C                            | -1.15391200 | -1.05336800 | -0.33767900 | Thermal correction to Gibbs Free Energy= 0.330669         |
| C                            | 0.22698200  | -1.05254300 | -0.30879700 | Sum of electronic and zero-point Energies= -1114.050427   |
| C                            | 0.89793800  | -0.06137200 | 0.46275100  | Sum of electronic and thermal Energies= -1114.024256      |
| C                            | 1.03761000  | -2.09003900 | -1.04712600 | Sum of electronic and thermal Enthalpies= -1114.023312    |
| C                            | 1.55452800  | -3.14880800 | -0.10398600 | Sum of electronic and thermal Free Energies= -1114.108477 |
| C                            | 2.82791700  | -3.41725800 | 0.20214900  |                                                           |
| C                            | 3.17096200  | -4.51446800 | 1.17438900  |                                                           |
| C                            | 4.02374000  | -2.69208900 | -0.35041100 |                                                           |
| C                            | 0.90696100  | 1.98419900  | 1.95687400  |                                                           |
| C                            | 1.81942300  | 2.81365600  | 1.07678900  |                                                           |
| C                            | 1.40625500  | 3.67306600  | 0.14132000  |                                                           |
| C                            | -3.36024000 | -0.06629500 | 0.37752000  |                                                           |
| O                            | 2.22624800  | -0.07297600 | 0.54148600  |                                                           |
| C                            | -0.04360400 | 3.95441700  | -0.14419600 |                                                           |
| C                            | 2.38292700  | 4.38396100  | -0.75362200 |                                                           |
| C                            | -4.17308200 | -0.87445400 | -0.31381500 |                                                           |

|                       |             |             |             |                                                           |
|-----------------------|-------------|-------------|-------------|-----------------------------------------------------------|
| C                     | -5.67412100 | -0.75610800 | -0.25282000 |                                                           |
| O                     | -6.32023400 | -1.56470700 | -0.97278100 |                                                           |
| O                     | -6.18327100 | 0.11923000  | 0.49298500  |                                                           |
| H                     | -1.78884200 | 1.61344300  | 1.67826900  |                                                           |
| H                     | -1.66153600 | -1.80783800 | -0.92864000 |                                                           |
| H                     | 0.39060400  | -2.55728700 | -1.79428400 |                                                           |
| H                     | 1.85840900  | -1.60287000 | -1.57785100 |                                                           |
| H                     | 0.77795300  | -3.74227300 | 0.37635700  |                                                           |
| H                     | 2.27849300  | -5.01240500 | 1.55624000  |                                                           |
| H                     | 3.81167300  | -5.26235000 | 0.69632900  |                                                           |
| H                     | 3.73561800  | -4.10996300 | 2.02064400  |                                                           |
| H                     | 4.69610600  | -3.40322600 | -0.84088700 |                                                           |
| H                     | 3.77104800  | -1.90823800 | -1.06286300 |                                                           |
| H                     | 4.59093000  | -2.23876100 | 0.46941200  |                                                           |
| H                     | 0.16933500  | 2.61296100  | 2.46164800  |                                                           |
| H                     | 1.50544000  | 1.50104500  | 2.73312200  |                                                           |
| H                     | 2.88744600  | 2.65029500  | 1.19256500  |                                                           |
| H                     | -3.81157500 | 0.70111100  | 1.00158500  |                                                           |
| H                     | 2.64347300  | 0.32617700  | -0.36943400 |                                                           |
| H                     | -0.70087200 | 3.66027900  | 0.67457700  |                                                           |
| H                     | -0.19079800 | 5.01983600  | -0.34241500 |                                                           |
| H                     | -0.36169700 | 3.41489900  | -1.04417000 |                                                           |
| H                     | 3.41430700  | 4.11025300  | -0.52511400 |                                                           |
| H                     | 2.18055300  | 4.13646400  | -1.80161000 |                                                           |
| H                     | 2.27701800  | 5.46942300  | -0.65995300 |                                                           |
| H                     | -3.78961900 | -1.65682900 | -0.96046600 |                                                           |
| H                     | 1.26420300  | 0.46168200  | -2.48779800 |                                                           |
| O                     | 2.81469900  | 0.93516500  | -1.55272200 |                                                           |
| O                     | 1.53824400  | 1.20355300  | -1.91904700 |                                                           |
| <b>Name</b>           |             |             |             | <b>TS-AC-ANION-C10-H-OOH-FHT (gas phase)</b>              |
| Cartesian Coordinates |             |             |             | Frequency and Energy                                      |
| C                     | -1.05568000 | -1.33199500 | -0.82150900 | Zero-point correction= 0.386911 (Hartree/Particle)        |
| C                     | -1.81578400 | -0.16752900 | -0.80193800 | Thermal correction to Energy= 0.414703                    |
| C                     | -1.31096700 | 1.06054100  | -0.35968800 | Thermal correction to Enthalpy= 0.415648                  |
| C                     | 0.02257400  | 1.08599900  | 0.06592600  | Thermal correction to Gibbs Free Energy= 0.320644         |
| C                     | 0.81395300  | -0.05976900 | 0.06594100  | Sum of electronic and zero-point Energies= -1113.908101   |
| C                     | 0.26365800  | -1.27058300 | -0.37873700 | Sum of electronic and thermal Energies= -1113.880309      |
| C                     | 2.23705700  | -0.03799700 | 0.54221100  | Sum of electronic and thermal Enthalpies= -1113.879365    |
| C                     | 3.26922300  | -0.41929400 | -0.42539800 | Sum of electronic and thermal Free Energies= -1113.974368 |
| C                     | 4.54812500  | -0.73401900 | -0.12328700 |                                                           |
| C                     | 5.53309700  | -1.12015000 | -1.18916200 |                                                           |
| C                     | 5.06647900  | -0.73328600 | 1.29188600  |                                                           |
| C                     | -1.64009100 | -2.65420800 | -1.27069200 |                                                           |
| C                     | -1.94849100 | -3.54920200 | -0.09640200 |                                                           |
| C                     | -3.13802600 | -3.74963900 | 0.47471900  |                                                           |
| C                     | -2.18726000 | 2.24195000  | -0.36399800 |                                                           |
| O                     | 0.98026300  | -2.44724500 | -0.38464400 |                                                           |
| C                     | -4.42532200 | -3.10680500 | 0.03369500  |                                                           |
| C                     | -3.27738300 | -4.64120300 | 1.68134000  |                                                           |
| C                     | -1.93469900 | 3.44412000  | 0.15624000  |                                                           |
| C                     | -2.95617800 | 4.59821200  | 0.09859400  |                                                           |
| O                     | -2.55554100 | 5.65300600  | 0.63187200  |                                                           |
| O                     | -4.04088900 | 4.34577000  | -0.46104500 |                                                           |
| H                     | -2.84623000 | -0.21010100 | -1.14380600 |                                                           |

|                       |             |             |             |                                                           |
|-----------------------|-------------|-------------|-------------|-----------------------------------------------------------|
| H                     | 0.46182700  | 2.02070600  | 0.39727000  |                                                           |
| H                     | 2.54743300  | 1.17665000  | 0.81662100  |                                                           |
| H                     | 2.37514900  | -0.47169200 | 1.53742200  |                                                           |
| H                     | 2.97763900  | -0.38841700 | -1.47355000 |                                                           |
| H                     | 5.07330000  | -1.13322100 | -2.17749600 |                                                           |
| H                     | 6.37997800  | -0.42549900 | -1.20780000 |                                                           |
| H                     | 5.94843200  | -2.11284000 | -0.98404600 |                                                           |
| H                     | 4.93121000  | -1.71658900 | 1.75662000  |                                                           |
| H                     | 6.13804400  | -0.51898800 | 1.30783600  |                                                           |
| H                     | 4.55771500  | 0.00447500  | 1.91517500  |                                                           |
| H                     | -2.53218300 | -2.45993000 | -1.86674600 |                                                           |
| H                     | -0.91822400 | -3.16200700 | -1.91659300 |                                                           |
| H                     | -1.07949800 | -4.03215100 | 0.34482800  |                                                           |
| H                     | -3.16554000 | 2.12167100  | -0.82627900 |                                                           |
| H                     | 1.90486700  | -2.26232500 | -0.19427300 |                                                           |
| H                     | -4.32149000 | -2.50850200 | -0.86928500 |                                                           |
| H                     | -5.19305200 | -3.86782300 | -0.14127500 |                                                           |
| H                     | -4.80198200 | -2.44949700 | 0.82409900  |                                                           |
| H                     | -2.31886100 | -5.07070000 | 1.97575800  |                                                           |
| H                     | -3.67942800 | -4.07789100 | 2.53004800  |                                                           |
| H                     | -3.97832800 | -5.45899100 | 1.48177500  |                                                           |
| H                     | -0.99628300 | 3.67543800  | 0.65610800  |                                                           |
| H                     | 4.71367900  | 2.00560700  | 0.03200700  |                                                           |
| O                     | 3.16921100  | 2.25186200  | 1.04165700  |                                                           |
| O                     | 3.87647000  | 2.47057700  | -0.10944900 |                                                           |
| <b>Name</b>           |             |             |             | <b>TS-AC-ANION-C2-H-OOH-RAF (gas phase)</b>               |
| Cartesian Coordinates |             |             |             | Frequency and Energy                                      |
| C                     | -1.11670200 | 1.07813200  | -0.75970800 | Zero-point correction= 0.392882 (Hartree/Particle)        |
| C                     | 0.24510800  | 1.34379600  | -0.82683500 | Thermal correction to Energy= 0.418886                    |
| C                     | 1.20836200  | 0.44933700  | -0.33373000 | Thermal correction to Enthalpy= 0.419831                  |
| C                     | 0.74751100  | -0.75518800 | 0.22453800  | Thermal correction to Gibbs Free Energy= 0.332789         |
| C                     | -0.60730300 | -1.04342700 | 0.32134100  | Sum of electronic and zero-point Energies= -1113.937684   |
| C                     | -1.53506100 | -0.12152100 | -0.18034800 | Sum of electronic and thermal Energies= -1113.911680      |
| C                     | -1.08630200 | -2.33967000 | 0.94335900  | Sum of electronic and thermal Enthalpies= -1113.910735    |
| C                     | -1.78025000 | -3.22665000 | -0.05934600 | Sum of electronic and thermal Free Energies= -1113.997777 |
| C                     | -3.02183800 | -3.72361200 | -0.01140600 |                                                           |
| C                     | -3.55051500 | -4.59233400 | -1.12348600 |                                                           |
| C                     | -4.00040500 | -3.50319900 | 1.11418700  |                                                           |
| C                     | -2.14363300 | 2.06537900  | -1.27074300 |                                                           |
| C                     | -2.82919600 | 2.78394700  | -0.13657700 |                                                           |
| C                     | -2.61153300 | 4.03206200  | 0.28301400  |                                                           |
| C                     | 2.62079300  | 0.76078900  | -0.41644500 |                                                           |
| O                     | -2.89157400 | -0.35349300 | -0.10669900 |                                                           |
| C                     | -1.61710200 | 4.98614000  | -0.32224900 |                                                           |
| C                     | -3.35439400 | 4.59040200  | 1.46921400  |                                                           |
| C                     | 3.60302600  | 0.10082700  | 0.29026800  |                                                           |
| C                     | 5.06759100  | 0.57354200  | 0.22996600  |                                                           |
| O                     | 5.29272100  | 1.68354000  | -0.25186900 |                                                           |
| O                     | 5.90191500  | -0.26023900 | 0.70117100  |                                                           |
| H                     | 0.57892800  | 2.27654800  | -1.27318400 |                                                           |
| H                     | 1.47608800  | -1.49019900 | 0.55160700  |                                                           |
| H                     | -0.21339800 | -2.86913200 | 1.33475500  |                                                           |
| H                     | -1.73457500 | -2.12153100 | 1.79575200  |                                                           |
| H                     | -1.17603900 | -3.46027400 | -0.93428100 |                                                           |



|                       |             |             |             |                                                           |
|-----------------------|-------------|-------------|-------------|-----------------------------------------------------------|
| H                     | -2.80997900 | -4.72988600 | -1.91171100 |                                                           |
| H                     | -3.83444800 | -5.57735800 | -0.73848200 |                                                           |
| H                     | -4.45044700 | -4.15202100 | -1.56520200 |                                                           |
| H                     | -4.94329300 | -3.10506700 | 0.72434400  |                                                           |
| H                     | -4.23734100 | -4.45810900 | 1.59439100  |                                                           |
| H                     | -3.63540900 | -2.82129600 | 1.88017300  |                                                           |
| H                     | -1.65515400 | 2.76505500  | -1.94938400 |                                                           |
| H                     | -2.89996400 | 1.52247900  | -1.84504800 |                                                           |
| H                     | -3.54375200 | 2.17493600  | 0.41295900  |                                                           |
| H                     | 2.93991900  | 1.53915800  | -1.10318100 |                                                           |
| H                     | -3.04366700 | -1.30488500 | -0.15450100 |                                                           |
| H                     | -2.11151500 | 5.91748700  | -0.61840800 |                                                           |
| H                     | -0.85735000 | 5.25136800  | 0.42013300  |                                                           |
| H                     | -1.10245700 | 4.57896300  | -1.19025800 |                                                           |
| H                     | -4.05587800 | 3.86371900  | 1.88103100  |                                                           |
| H                     | -2.65386100 | 4.88069800  | 2.25939400  |                                                           |
| H                     | -3.91100100 | 5.49189800  | 1.19062700  |                                                           |
| H                     | 3.32119200  | -0.44503500 | 1.18559500  |                                                           |
| H                     | 5.31282400  | -1.64923000 | 0.55531000  |                                                           |
| O                     | 3.86315200  | -1.60040500 | -0.57848300 |                                                           |
| O                     | 4.56024100  | -2.32325100 | 0.34681500  |                                                           |
| <b>Name</b>           |             |             |             | <b>TS-AC-ANION-C3-H-OOH-RAF (gas phase)</b>               |
| Cartesian Coordinates |             |             |             | Frequency and Energy                                      |
| C                     | -0.49033700 | 1.12274700  | -0.97661300 | Zero-point correction= 0.393454 (Hartree/Particle)        |
| C                     | 0.76451100  | 0.53256700  | -1.06494800 | Thermal correction to Energy= 0.419787                    |
| C                     | 1.04748000  | -0.71068400 | -0.49492600 | Thermal correction to Enthalpy= 0.420731                  |
| C                     | 0.00082300  | -1.39467700 | 0.12253000  | Thermal correction to Gibbs Free Energy= 0.333793         |
| C                     | -1.28013400 | -0.85116300 | 0.20373300  | Sum of electronic and zero-point Energies= -1113.916186   |
| C                     | -1.51491400 | 0.41482400  | -0.34425700 | Sum of electronic and thermal Energies= -1113.889853      |
| C                     | -2.39674300 | -1.58737800 | 0.91590900  | Sum of electronic and thermal Enthalpies= -1113.888908    |
| C                     | -3.53533500 | -1.93259500 | -0.01081500 | Sum of electronic and thermal Free Energies= -1113.975847 |
| C                     | -4.82782100 | -1.60533600 | 0.10398000  |                                                           |
| C                     | -5.82903300 | -2.03345400 | -0.93754800 |                                                           |
| C                     | -5.42417500 | -0.81597300 | 1.24139500  |                                                           |
| C                     | -0.68605400 | 2.56175000  | -1.40118800 |                                                           |
| C                     | -0.39620500 | 3.45659700  | -0.21643500 |                                                           |
| C                     | 0.80062900  | 3.92940700  | 0.14420900  |                                                           |
| C                     | 2.44671800  | -1.19345400 | -0.49029500 |                                                           |
| O                     | -2.73938000 | 1.03142400  | -0.22935800 |                                                           |
| C                     | 2.07752000  | 3.70778600  | -0.62476900 |                                                           |
| C                     | 0.97695200  | 4.69676200  | 1.42825400  |                                                           |
| C                     | 2.89701500  | -2.23980900 | 0.29055000  |                                                           |
| C                     | 4.17977500  | -3.00837000 | -0.03887000 |                                                           |
| O                     | 4.38812300  | -3.98193200 | 0.71338600  |                                                           |
| O                     | 4.82337100  | -2.59120000 | -1.02049900 |                                                           |
| H                     | 1.57977500  | 1.07845300  | -1.52919300 |                                                           |
| H                     | 0.18873400  | -2.36770200 | 0.56353100  |                                                           |
| H                     | -1.98490500 | -2.51259200 | 1.32846100  |                                                           |
| H                     | -2.74399400 | -0.99226500 | 1.76427900  |                                                           |
| H                     | -3.23611700 | -2.50352200 | -0.88818400 |                                                           |
| H                     | -5.35743900 | -2.60374800 | -1.73815800 |                                                           |
| H                     | -6.61150600 | -2.65160300 | -0.48537900 |                                                           |
| H                     | -6.32610600 | -1.16284500 | -1.37745000 |                                                           |
| H                     | -6.15103700 | -1.43183100 | 1.78055700  |                                                           |

|                       |             |             |             |                                                           |
|-----------------------|-------------|-------------|-------------|-----------------------------------------------------------|
| H                     | -4.68666400 | -0.45922600 | 1.95801100  |                                                           |
| H                     | -5.97163300 | 0.05021100  | 0.85503700  |                                                           |
| H                     | -0.01681600 | 2.78249500  | -2.23459300 |                                                           |
| H                     | -1.71157400 | 2.71718700  | -1.73909700 |                                                           |
| H                     | -1.24113600 | 3.63587300  | 0.44511300  |                                                           |
| H                     | 3.04219300  | -1.00353500 | -1.37960700 |                                                           |
| H                     | -3.42514800 | 0.35401200  | -0.19820500 |                                                           |
| H                     | 2.68759800  | 4.61569400  | -0.61180700 |                                                           |
| H                     | 2.67402500  | 2.91157900  | -0.16243400 |                                                           |
| H                     | 1.90477100  | 3.42912900  | -1.66396100 |                                                           |
| H                     | 0.03691100  | 4.79322700  | 1.97346800  |                                                           |
| H                     | 1.70286500  | 4.18830500  | 2.07152500  |                                                           |
| H                     | 1.37210500  | 5.69875600  | 1.23089800  |                                                           |
| H                     | 2.36378000  | -2.53329100 | 1.19024500  |                                                           |
| H                     | 1.65783400  | 1.11062100  | 1.08813900  |                                                           |
| O                     | 3.23185100  | 0.36482000  | 0.39019100  |                                                           |
| O                     | 2.46971700  | 0.74680600  | 1.47870900  |                                                           |
| <b>Name</b>           |             |             |             | <b>TS-AC-ANION-C11-H-OOH-RAF (gas phase)</b>              |
| Cartesian Coordinates |             |             |             | Frequency and Energy                                      |
| C                     | -0.93904800 | 1.28516600  | 0.67336900  | Zero-point correction= 0.392266 (Hartree/Particle)        |
| C                     | -1.81224400 | 0.20225100  | 0.62577200  | Thermal correction to Energy= 0.419534                    |
| C                     | -1.43890500 | -1.04338700 | 0.10896300  | Thermal correction to Enthalpy= 0.420478                  |
| C                     | -0.14776800 | -1.15309600 | -0.41979400 | Thermal correction to Gibbs Free Energy= 0.328887         |
| C                     | 0.74873800  | -0.08959400 | -0.40502800 | Sum of electronic and zero-point Energies= -1113.912594   |
| C                     | 0.34966700  | 1.12234900  | 0.16782700  | Sum of electronic and thermal Energies= -1113.885326      |
| C                     | 2.14184500  | -0.25291800 | -0.97704700 | Sum of electronic and thermal Enthalpies= -1113.884382    |
| C                     | 3.15604300  | -0.40573300 | 0.12846900  | Sum of electronic and thermal Free Energies= -1113.975974 |
| C                     | 4.07585400  | 0.55326200  | 0.52472400  |                                                           |
| C                     | 4.86718000  | 0.34666100  | 1.77780800  |                                                           |
| C                     | 4.55926700  | 1.65058300  | -0.37472100 |                                                           |
| C                     | -1.36735000 | 2.62331100  | 1.23562300  |                                                           |
| C                     | -1.61231000 | 3.62824400  | 0.13844500  |                                                           |
| C                     | -2.79009500 | 4.02226300  | -0.35025300 |                                                           |
| C                     | -2.38820800 | -2.16690300 | 0.14257900  |                                                           |
| O                     | 1.19817800  | 2.21177200  | 0.21664000  |                                                           |
| C                     | -4.13029100 | 3.52785600  | 0.12374900  |                                                           |
| C                     | -2.86556900 | 5.00822800  | -1.48714700 |                                                           |
| C                     | -2.09027500 | -3.46052100 | 0.00987500  |                                                           |
| C                     | -3.15040200 | -4.57640400 | 0.08190800  |                                                           |
| O                     | -2.68514000 | -5.72239600 | -0.08943400 |                                                           |
| O                     | -4.32099100 | -4.21045100 | 0.29955800  |                                                           |
| H                     | -2.81575400 | 0.31913000  | 1.02548700  |                                                           |
| H                     | 0.16063400  | -2.08894300 | -0.87459000 |                                                           |
| H                     | 2.16216500  | -1.16076100 | -1.58327700 |                                                           |
| H                     | 2.39354600  | 0.58183000  | -1.63446000 |                                                           |
| H                     | 2.84920200  | -1.11117100 | 0.89796900  |                                                           |
| H                     | 4.46095300  | -0.46259600 | 2.38423800  |                                                           |
| H                     | 5.90427100  | 0.09466100  | 1.52223100  |                                                           |
| H                     | 4.89947800  | 1.26021700  | 2.38016900  |                                                           |
| H                     | 4.82638600  | 2.53945200  | 0.20369200  |                                                           |
| H                     | 5.46949000  | 1.31269600  | -0.88697700 |                                                           |
| H                     | 3.84181100  | 1.93740100  | -1.14307300 |                                                           |
| H                     | -2.25577800 | 2.48056600  | 1.85111700  |                                                           |
| H                     | -0.57438300 | 3.00458900  | 1.88536200  |                                                           |

|                       |             |             |             |                                                           |
|-----------------------|-------------|-------------|-------------|-----------------------------------------------------------|
| H                     | -0.70834100 | 4.02352900  | -0.31989300 |                                                           |
| H                     | -3.43367600 | -1.93014600 | 0.33167900  |                                                           |
| H                     | 2.09936400  | 1.89628400  | 0.33955900  |                                                           |
| H                     | -4.06331800 | 2.83444200  | 0.95969000  |                                                           |
| H                     | -4.76531800 | 4.36900800  | 0.42142200  |                                                           |
| H                     | -4.64631800 | 3.01319200  | -0.69323900 |                                                           |
| H                     | -1.87326200 | 5.33157900  | -1.80420400 |                                                           |
| H                     | -3.37561800 | 4.56335800  | -2.34810500 |                                                           |
| H                     | -3.44337000 | 5.89256900  | -1.19720400 |                                                           |
| H                     | -1.06800700 | -3.79985500 | -0.14667200 |                                                           |
| H                     | 3.64684500  | -3.33307500 | -0.50263600 |                                                           |
| O                     | 4.45574500  | -1.65080400 | -0.63832300 |                                                           |
| O                     | 3.76623600  | -2.69032900 | -1.21581600 |                                                           |
| <b>Name</b>           |             |             |             | <b>TS-AC-ANION-C12-H-OOH-RAF (gas phase)</b>              |
| Cartesian Coordinates |             |             |             | Frequency and Energy                                      |
| C                     | -0.97537700 | 1.24871800  | 0.73529900  | Zero-point correction= 0.392212 (Hartree/Particle)        |
| C                     | -1.97158000 | 0.27975100  | 0.65364500  | Thermal correction to Energy= 0.419266                    |
| C                     | -1.74063100 | -0.99733000 | 0.13153500  | Thermal correction to Enthalpy= 0.420210                  |
| C                     | -0.45403200 | -1.26568000 | -0.35243900 | Thermal correction to Gibbs Free Energy= 0.329659         |
| C                     | 0.56258700  | -0.31899800 | -0.30345100 | Sum of electronic and zero-point Energies= -1113.912578   |
| C                     | 0.29524100  | 0.93452300  | 0.25950400  | Sum of electronic and thermal Energies= -1113.885524      |
| C                     | 1.94006600  | -0.61234600 | -0.86769800 | Sum of electronic and thermal Enthalpies= -1113.884579    |
| C                     | 2.99464100  | -0.61692100 | 0.19564100  | Sum of electronic and thermal Free Energies= -1113.975130 |
| C                     | 4.23312400  | -0.00600600 | 0.12418100  |                                                           |
| C                     | 5.06094900  | 0.09805500  | 1.37911300  |                                                           |
| C                     | 4.56242800  | 0.98592400  | -0.96505200 |                                                           |
| C                     | -1.25490000 | 2.62699400  | 1.29426100  |                                                           |
| C                     | -1.36714300 | 3.65276800  | 0.19515100  |                                                           |
| C                     | -2.48135500 | 4.20690900  | -0.28725200 |                                                           |
| C                     | -2.83223600 | -1.98294200 | 0.10760400  |                                                           |
| O                     | 1.26253800  | 1.91889800  | 0.32596400  |                                                           |
| C                     | -3.87486000 | 3.90929200  | 0.19735000  |                                                           |
| C                     | -2.42498000 | 5.19122700  | -1.42678400 |                                                           |
| C                     | -2.72521000 | -3.29425600 | -0.11316600 |                                                           |
| C                     | -3.94253400 | -4.24005000 | -0.11236800 |                                                           |
| O                     | -3.65897100 | -5.42392600 | -0.38833900 |                                                           |
| O                     | -5.04257300 | -3.72058600 | 0.15632000  |                                                           |
| H                     | -2.96496200 | 0.51657400  | 1.02450800  |                                                           |
| H                     | -0.24740400 | -2.23298200 | -0.79787000 |                                                           |
| H                     | 1.91781200  | -1.60073800 | -1.34004000 |                                                           |
| H                     | 2.18217900  | 0.11206400  | -1.65021600 |                                                           |
| H                     | 2.78411000  | -1.23675500 | 1.06361300  |                                                           |
| H                     | 4.83164800  | -0.71269200 | 2.07277600  |                                                           |
| H                     | 6.12689500  | 0.07962300  | 1.13542100  |                                                           |
| H                     | 4.85745300  | 1.04560100  | 1.88758600  |                                                           |
| H                     | 4.01568200  | 1.92508300  | -0.82937600 |                                                           |
| H                     | 5.63003000  | 1.20817300  | -0.95291200 |                                                           |
| H                     | 4.31307300  | 0.58351700  | -1.94687400 |                                                           |
| H                     | -2.16225200 | 2.58683800  | 1.89705400  |                                                           |
| H                     | -0.43244600 | 2.91437400  | 1.95577800  |                                                           |
| H                     | -0.41987700 | 3.91748400  | -0.26994500 |                                                           |
| H                     | -3.83453000 | -1.61359300 | 0.31719600  |                                                           |
| H                     | 2.12542700  | 1.49752100  | 0.39450400  |                                                           |
| H                     | -3.90232800 | 3.20744900  | 1.02841600  |                                                           |

|   |             |             |             |
|---|-------------|-------------|-------------|
| H | -4.37724600 | 4.83194100  | 0.50682600  |
| H | -4.46818300 | 3.48224800  | -0.61759100 |
| H | -1.39919600 | 5.37175900  | -1.75070500 |
| H | -2.99773500 | 4.82016000  | -2.28323300 |
| H | -2.87148800 | 6.14837100  | -1.13614500 |
| H | -1.76582600 | -3.77079500 | -0.30523000 |
| H | 6.16620400  | -2.28462700 | 0.58086600  |
| O | 5.20470300  | -1.44903100 | -0.77827200 |
| O | 5.39277500  | -2.52465800 | 0.05247000  |

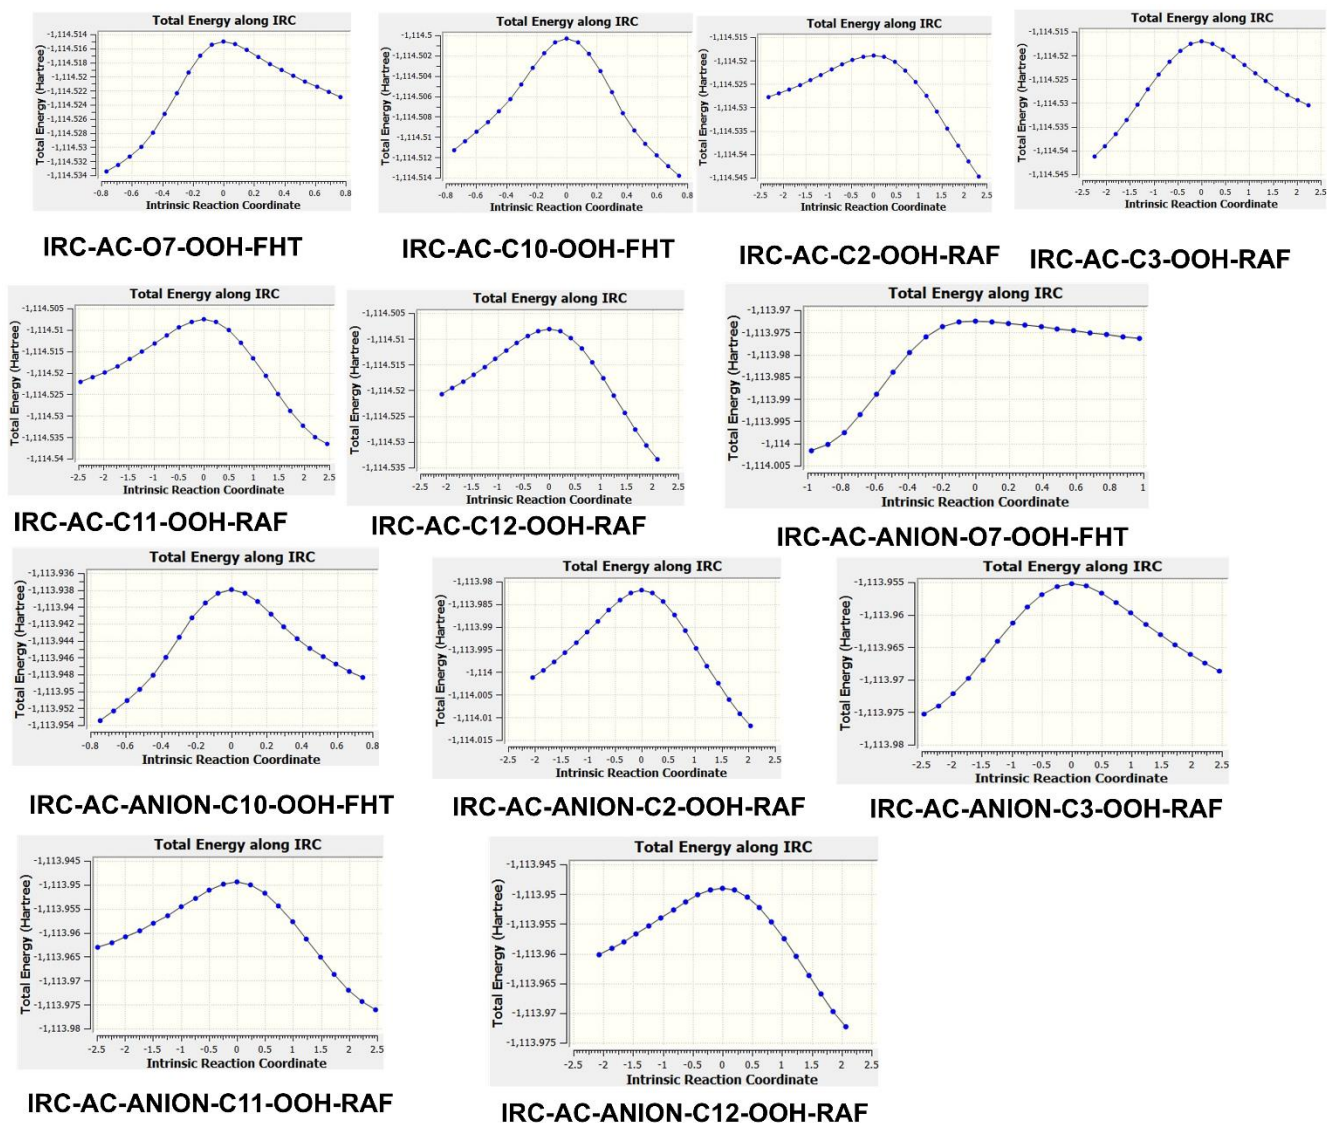

Figure S1. IRC plots for the transition states related to the reaction of HOO<sup>\*</sup> radical with AC compound

## References

1. M. G. Evans and M. Polanyi, *Trans. Faraday Soc.*, 1935, **31**, 875-894.
2. H. Eyring, *J. Chem. Phys.*, 1935, **3**, 107-115.
3. D. G. Truhlar, W. L. Hase and J. T. Hynes, *J. Phys. Chem.*, 1983, **87**, 2664-2682.
4. T. Furuncuoglu, I. Ugur, I. Degirmenci and V. Aviyente, *Macromolecules*, 2010, **43**, 1823-1835.
5. E. Vélez, J. Quijano, R. Notario, E. Pabón, J. Murillo, J. Leal, E. Zapata and G. Alarcón, *J. Phys. Org. Chem.*, 2009, **22**, 971-977.
6. E. Pollak and P. Pechukas, *J. Am. Chem. Soc.*, 1978, **100**, 2984-2991.
7. A. Fernández-Ramos, B. A. Ellingson, R. Meana-Pañeda, J. M. Marques and D. G. Truhlar, *Theor. Chem. Acc.*, 2007, **118**, 813-826.
8. C. Eckart, *Phy. Rev.*, 1930, **35**, 1303.
9. R. A. Marcus, *Annu. Rev. Phys. Chem.*, 1964, **15**, 155-196.
10. R. A. Marcus, *Rev. Mod. Phys.*, 1993, **65**, 599.
11. Y. Lu, A. Wang, P. Shi and H. Zhang, *PloS one*, 2017, **12**, e0169773.
12. Y. Lu, A. Wang, P. Shi, H. Zhang and Z. Li, *PloS one*, 2015, **10**, e0133259.
13. S. F. Nelsen, S. C. Blackstock and Y. Kim, *J. Am. Chem. Soc.*, 1987, **109**, 677-682.
14. S. F. Nelsen, M. N. Weaver, Y. Luo, J. R. Pladziewicz, L. K. Ausman, T. L. Jentzsch and J. J. O'Konek, *J. Phys. Chem. A*, 2006, **110**, 11665-11676.
15. A. Galano and J. R. Alvarez-Idaboy, *J. Comput. Chem.*, 2013, **34**, 2430-2445.
16. F. C. Collins and G. E. Kimball, *J. Colloid Sci.*, 1949, **4**, 425-437.
17. M. Von Smoluchowski, *Z. Phys. Chem*, 1917, **92**, 129-168.
18. D. G. Truhlar, *J. Chem. Educ.*, 1985, **62**, 104.
19. A. Einstein, *Ann. Phys.*, 1905, **17**, 549-560.
20. G. G. Stokes, *Mathematical and Physical Papers*, University Press, Cambridge, 1905.
21. A. Galano and J. Raúl Alvarez-Idaboy, *Int. J. Quantum Chem.*, 2019, **119**, e25665.
22. Q. V. Vo, T. V. Gon, M. V. Bay and A. Mechler, *J. Phys. Chem. B*, 2019, **123**, 10672-10679.
23. H. Boulebd, I. Amine Khodja, M. V. Bay, N. T. Hoa, A. Mechler and Q. V. Vo, *J. Phys. Chem. B*, 2020, DOI: 10.1021/acs.jpcc.0c02439.
24. Y. Okuno, *Chem.: Eur. J.*, 1997, **3**, 212-218.
25. S. Benson, *The foundations of chemical kinetics*, Malabar, Florida, 1982.
26. C. Iuga, J. R. Alvarez-Idaboy and A. Vivier-Bunge, *J. Phys. Chem. B*, 2011, **115**, 12234-12246.
27. J. R. Alvarez-Idaboy, L. Reyes and N. Mora-Diez, *Org. Biomol. Chem.*, 2007, **5**, 3682-3689.
28. T. H. Le, T. T. Tran and L. K. Huynh, *Chemom. Intell. Lab. Syst.*, 2018, **172**, 10-16.
